1 **A LAMP-based microfluidic chip for rapid detection of pathogen in Cryptococcal**  
2 **meningitis**

3

4 Yueru Tian<sup>1†</sup>, Tong Zhang<sup>2†</sup>, Jian Guo<sup>3</sup>, Huijun Lu<sup>2</sup>, Yuhan Yao<sup>2</sup>, Xi Chen<sup>2</sup>, Xinlian  
5 Zhang<sup>2</sup>, Guodong Sui<sup>2\*</sup>, Ming Guan<sup>1\*</sup>

6 1. Department of Laboratory Medicine, Huashan Hospital, Shanghai Medical College,  
7 Fudan University, Shanghai, China. Email: vicky8025@126.com.

8 2. Department of Environmental Science & Engineering, Fudan University, Shanghai,  
9 China. Department of Medical Microbiology & Parasitology, Institute of Biomedical  
10 Science, Basic Medical College of Fudan University, Shanghai, China. Email:  
11 shmzhyzt@163.com, 19110740007@fudan.edu.cn, 16110740002@fudan.edu.cn,  
12 18210740002@fudan.edu.cn, 17110740037@fudan.edu.cn.

13 3. Department of Laboratory Medicine, Shanghai East Hospital, Tongji University  
14 School of Medicine, Shanghai, China. Email: guojian1110@126.com.

15

16 <sup>†</sup>These authors contributed equally to this work.

17 \*Correspondence should be addressed to Guodong Sui (gsui@fudan.edu.cn) or Ming  
18 Guan (guanming88@126.com)

19

20 **Abstract:** Cryptococcal meningitis (CM) is a global threat with significant attributable  
21 morbidity and mortality. Information on integrated detection for CM diagnosis is still  
22 limited. This is mainly due to the presence of a large polysaccharide capsule and the  
23 tough cell wall of *Cryptococcus*, which makes it difficult to extract nucleic acids on the  
24 chip. In this study, we developed a LAMP-based microfluidic chip for rapid detection of  
25 pathogen in CM. We adopted 4 duplicate filtration membrane structures to improve target

26 capture and simplify the enrichment process, and combined lyticase digestion and  
27 thermal alkaline lysis to optimize the nucleic acid extraction of *Cryptococcus* on the chip,  
28 and selected a portable UVA flashlight to shine the LAMP products to obtain the visual  
29 detection results which could be observed by the naked eye. This microfluidic chip,  
30 integrating sample *Cryptococcus* enrichment, nucleic acid extraction and LAMP  
31 detection unit, streamlined the operation process and reduced the exposure risk of directly  
32 handling cryptococcal samples. It did not require any additional instruments and  
33 demonstrated a rapid, reliable, as well as high-efficiency approach. It truly realized the  
34 "sample-to-answer" application and could be easily used for clinical cryptococcal  
35 prediagnosis.

36 **KEYWORDS:** Microfluidic chip, LAMP, Cryptococcal meningitis

37

## 38 **Introduction**

39 *Cryptococcus* is an opportunistic pathogenic fungus that resides in diverse ecological  
40 niches, especially abundant in eucalyptus, avian excreta and amoeba. Among the 70  
41 species identified, *C. neoformans* and *C. gatti* are the major causative agents of human  
42 cryptococcosis[1]. Found widely in soil, decaying wood, and bird droppings,  
43 *Cryptococcus* spores floating in the environment are inhaled by humans, causing  
44 pneumonia in immunocompromised patients, but in immunocompetent hosts the fungal  
45 cells are either cleared by the immune system or establish an asymptomatic latent  
46 infection. Once the infected subject becomes immunosuppressed, the latent infection can  
47 disseminate to other tissues, most notably the central nervous system (CNS), causing  
48 life-threatening subacute meningitis[1].

49 Cryptococcal meningitis (CM) is the most common cause of HIV-related meningitis,  
50 causing an estimated 223 100 (95% CI 150 600-282 400) incident cases and 181 100 (95%

51 CI 119 400-234 300) deaths per year[2]. Globally, CM was responsible for 15% of  
52 HIV-related deaths[2]. In recent years, an increasing number of CM cases have been  
53 reported in non-HIV infected individuals, mainly including patients with natural and  
54 iatrogenic immunosuppression, such as patients with organ or stem-cell transplantation,  
55 malignant tumors, autoimmune diseases, glucocorticoid or immunosuppressive therapies  
56 (including chemo-, radio-, or immunotherapy for cancer), or even “immunocompetent  
57 individuals” carrying underlying immune deficiencies, chronic liver, kidney or lung  
58 disease and diabetes[3]. In-hospital mortality of non-HIV-related CM has now reached  
59 approximately 25% [4,5]. However, there are still about 65–70% of non-HIV CM  
60 patients without any predisposing factors, particularly in China[6-8], Korea[9], Japan[10]  
61 and India[11]. Moreover, *C. gattii* has been considered as the culprit causing CM in  
62 immunocompetent hosts, highlighted in Australia, Canada, and the U.S. Pacific  
63 Northwest[12]. Worldwide, the mortality rate of patients with *C. gattii* infections ranges  
64 from 13% to 33%[12].

65 Currently, the diagnosis of CM still poses some difficulties. One is attributed to  
66 atypical symptoms (fever, headache, nausea, vomiting), which are easily confused with  
67 upper respiratory tract infection, tuberculous meningitis, viral meningitis or neurological  
68 diseases. Another is that conventional CM diagnostic techniques have some limitations.  
69 Both of these challenges lead to delayed diagnosis and higher morbidity and mortality.  
70 To date, diagnosis of CM has mainly relied on cerebrospinal fluid (CSF) India ink  
71 microscopic staining, culture, cryptococcal antigen (CrAg) testing or histopathological  
72 examination. Although India ink microscopic staining has been a quick method,  
73 unfortunately sensitivity is low (86% in expert hands)[13]. The cultivation technique is  
74 time-consuming and usually takes 3-7 days to report, and once antibiotic treatment is  
75 established, false negative results are prone to occur (the sensitivity is approximately

76 78.4%)[13]. CrAg detection has a sensitivity and specificity of 99% in CSF, but latex  
77 agglutination (LA) is more expensive, more labor-intensive, and requires cold-chain  
78 shipping/storage[14]. Patients with rheumatoid factor positive, tuberculous meningitis or  
79 systemic lupus erythematosus may have a false positive reaction. The LA antigen titer of  
80 patients infected with *Trichosporon* can reach 1:1000[15]. Moreover, hemolytic samples  
81 and “hook effect” caused by high concentrations of CrAg can lead to false negative  
82 results in lateral flow assay (LFA)[16]. Histopathological examinations are complicated in  
83 preparation and staining processes, and microscopic examinations require experienced  
84 staff. Therefore, it is an urgent need to develop a rapid and sensitive diagnostic technique  
85 to complement the deficiencies of existing methods.

86 With the characteristics of rapid and high sensitivity, various polymerase chain  
87 reaction (PCR) technologies, such as nested PCR[17], real-time PCR[18,19], and  
88 singleplex PCR[20], have been applied to CM diagnosis. However, the extraction process  
89 of cryptococcal nucleic acid is labor intensive and cumbersome. Direct operation of  
90 samples containing *Cryptococcus* also increases the risk of exposures. Therefore, the  
91 development of integrated molecular amplification detection of cryptococcal samples is  
92 of great significance. Among the existing detection technology, nested PCR shows high  
93 specificity, but it must be carried out in two steps. Real-time PCR requires the  
94 establishment of a standard curve, internal reference and precise temperature control. All  
95 of these limit the possibility of developing integrated detection. Loop-mediated  
96 isothermal amplification (LAMP) is a good way to avoid these limitations. It is  
97 characterized by simple operation, isothermal amplification, short time required, simple  
98 equipment, and has shown promising potential in integrated detection applications.

99 Microfluidic chips integrated with LAMP assay for detecting bacterial meningitis, such  
100 as meningitis caused by *Neisseria meningitides*[21,22], *Streptococcus pneumoniae*[21]

101 and *Haemophilus influenzae* type b[21], have been developed and shown high sensitivity  
102 and specificity. Recent researchs on rapid integrated detection of pathogens are mainly  
103 dedicated to any link in sample pretreatment (pathogen enrichment) or amplification  
104 method (isothermal amplification) or signal detection (colloidal gold enhanced  
105 signal)[23-26], but few solutions are available for CM detection, mainly due to the tough  
106 cell wall of *Cryptococcus* and the presence of large polysaccharide capsule (accounting  
107 for approximately 70% of the whole cellular volume) in its outer layer, which makes it  
108 difficult to achieve successful nucleic acid extraction in the chip. Various methods  
109 proposed to extract and purify DNA from *Cryptococcus* included bead rupture method,  
110 enzymatic cell wall lysis method and chemical reagents lysing method, yet the first  
111 method is difficult to implement in a functional chip due to its mechanical properties. To  
112 solve this issue, we combined the use of lyticase digestion, and thermal alkaline lysis in  
113 the microfluidic chip to achieve effective nucleic acid extraction. In addition, we used a  
114 filter membrane to capture the target and a portable UVA flashlight to read the amplified  
115 signal, thus simplifying the entire operation process.

116 Here we developed a LAMP-based microfluidic chip to combine rapid filter  
117 membrane-based sample concentration, nucleic acid extraction, target DNA amplification,  
118 and portable UVA flashlight signal reading of pathogens from CSF samples, which  
119 demonstrated a rapid, high-efficiency approach, and enabled “sample-to-answer”  
120 detection from real CSF samples.

121

## 122 **Materials and Methods**

### 123 **CSF samples**

124 Between March 2019 and November 2019, 83 clinical CSF samples that were LFA  
125 positive (CrAg titers ranging 1:1–1:20,480) were collected from CM patients of Shanghai

126 Huashan Hospital in China. A total of 40 clinical positive-cultured CSF samples collected  
127 from patients with other CNS infections (diagnosed by culture or pathology) (Table S1).  
128 Sterile human CSF was collected from a non-infected patient who required CSF drainage  
129 due to high CSF pressure, with his consent in Shanghai Huashan Hospital. With ethical  
130 approval (accession number: KY2019 HIRB-002), all patients involved signed informed  
131 consent forms, understanding and agreeing to use their clinical samples in this study.

132

### 133 **Isolates**

134 Eleven standard strains containing different serotypes, genotypes and AFLP types were  
135 donated by Professor Min Chen (Table S2). Fifty strains used for specificity verification  
136 were collected from Shanghai Huashan Hospital and confirmed by MALDI–TOF mass  
137 spectrometry (Bruker Daltonics, Bremen, Germany) and nucleic acid sequence. (Table  
138 S3).

139

### 140 **Standard Nucleic acid extraction**

141 Genomic DNA from cultured microorganisms was extracted using the Yeast DNA Kit  
142 (Omega Bio-Tek, Norcross, GA). Genomic DNA from the clinical samples was extracted  
143 using the QIAamp DNA Mini Kit (QIAGEN, Hilden, Germany) with some modifications:  
144 an initial incubation with lyticase (10U) at 30 °C for 45 min, followed by AL buffer  
145 incubation at 90 °C for 10 min, was included. The concentration of DNA was evaluated  
146 using Qubit 3.0 fluorometer (Invitrogen, ThermoFisher Scientific, Malaysia).

147

### 148 **LAMP assay performance verification**

149 LAMP primers were designed using Primer Explorer V4 software  
150 (<http://primerexplorer.jp/e/>) based on the *Cryptococcus* capsular-associated protein 10

151 gene (CAP10) (Table 1). The assay was run on an ABI Prism 7500 real-time PCR system  
152 (Applied Biosystems, USA). The reaction was carried out in a 25 µl reaction mixture  
153 containing 13 µl 1×ThermoPol Buffer (20 mM Tris-HCl, 50 mM KCl, 10 mM  
154 (NH<sub>4</sub>)<sub>2</sub>SO<sub>4</sub>, 2 mM MgSO<sub>4</sub>, 0.1% Tween 20, 6 mM MgSO<sub>4</sub>, 1.4 mM dNTP mixture,  
155 5×SYBR Green), 1 µl target-specific primer mixture (1.6 µM FIP/BIP, and 0.2 µM  
156 F3/B3), 1 µl 8 U of Bst DNA polymerase and 10 µl of DNA. The mixture was incubated  
157 at 64.8 °C for 5 s, 65 °C for 55 s (collecting the fluorescent) for 45 minutes. The sterile  
158 CSF and ultra-purified water were used as negative controls. As a positive control, 1ng/µl  
159 purified *C. neoformans* DNA was used.

160 Evaluation of the accuracy of the LAMP assay: Eleven standard strains containing  
161 different serotypes, genotypes and AFLP types were adjusted to 0.5 McFarland standard  
162 suspensions and DNA was extracted for LAMP accuracy verification.

163 Evaluation of the specificity of the LAMP assay: DNA extracted from forty clinical  
164 positive-cultured CSF samples collected from patients with other CNS infections  
165 (including *Enterobacteriaceae*, *Acinetobacter*, *Staphylococcus*, *Enterococcus*, *Listeria sp*,  
166 *Candida*, *Nocardia*, *Mycobacterium*, *Aspergillus*, *Cysticercus* and complex infection)  
167 (Table S1), one sterile human CSF sample (negative control), one ultra-filtered water  
168 (negative control), and fifty pure cultures of microorganisms (including different species  
169 and closely related species) (Table S3), was tested for LAMP specificity.

170 Evaluation of the detection limits of the LAMP assay: Continuously dilute (1:10) the *C.*  
171 *neoformans* yeast suspensions and its DNA into sterile CSF ranging from 10<sup>8</sup> CFU/ml to  
172 1 CFU/ml and 1ng/µl to 1fg/µl, then extract the DNA and use it for sensitivity  
173 verification.

174 Evaluation of the precision of the LAMP assay: The precision assay was divided into  
175 intra-batch and inter-batch trials. The intra-batch trial selects 20 1 pg/µl weak positive

176 samples and 20 ultra-filtered water samples for testing together. The inter-batch trial  
177 selects one 1pg/ $\mu$ l weakly positive sample and one ultra-filtered water sample and tests  
178 once a day for 20 days.

179 Analysis of clinical samples: DNA extracted from 83 LFA-positive CSF samples was  
180 used as a template for LAMP assay.

181

## 182 **Chip fabrication**

183 All the microchannels and the reaction holes were fabricated using soft lithography. The  
184 PDMS (Momentive, NY, USA) prepolymer and curing agent were mixed at a ratio of 5:1  
185 (w:w) and 7:1 (w:w) to prepare different layers. The mixture was casted onto a silicon  
186 wafer having different patterns of SU-8 2100 (MicroChem, MA, USA) and AZ-50 (AZ  
187 Electronic Materials, Merck, USA) and cured at 80 °C, afterwards the cured PDMS layer  
188 was peeled off from the wafer. Holes in reaction layer, mixed layers and filtration layers  
189 were punched with 2mm and 5mm perforators respectively. The 1  $\mu$ m pore diameter  
190 sized polycarbonate membranes (General Electric, WI, USA) were sealed between the  
191 mixed layers and cured at 80 °C for 6 h. A ratio of 10:1 PDMS prepolymer/curing agent  
192 was injected into the filling channel through the filling inlet and was cured at 120 °C for  
193 5 min to solidify the filtration layers sandwich. Then, the reaction layer, collection layers,  
194 mixed layers and filtration layers were aligned and heated sealing together at 80 °C  
195 overnight.

196

## 197 **On-chip nucleic acid extraction**

198 In order to obtain free nucleic acid in microfluidic chip, we combined lyticase, Qiagen  
199 DNA Kit AL buffer (QIAGEN, Hilden, Germany), Novagen Bugbuster Master Mix



200 (Novagen, Merck, USA) and three additives (NaOH, SDS, urea) to select the best  
201 extraction strategy. Besides, temperature was another influencing factor.

202

### 203 **On-chip LAMP amplification and signal detection**

204 After nucleic acid extraction, the LAMP reaction solution and nucleic acid were injected  
205 into the reaction wells. Polyester (PET) film (General Electric, WI, USA) sealed the top  
206 layer, and the integrated chip was incubated in an oven at 65 °C for 45 minutes. After  
207 on-chip LAMP amplifications, a portable UV flashlight was applied to shine LAMP  
208 products to obtain the visual detection results. The generated fluorescence could be  
209 observed by the naked eye.

210

## 211 **Results**

### 212 **LAMP assay performance verification**

213 The accuracy of the LAMP assay: Analysis of 11 different serotypes, genotypes and  
214 AFLP types of *C. neoformans/gattii* standard strains showed that accuracy was 100%  
215 (Table S2).

216 The specificity of the LAMP assay: The results showed that the specificity of the assay  
217 is 100%, as both the 40 clinical samples from patients with other CNS infections and 2  
218 negative controls (0 positive/42 samples) (Table S1) gave negative results, and no  
219 cross-reaction was observed in 50 other pure cultured microorganisms (0/50) (Table S3).

220 The detection limits of the LAMP assay: The optimized LAMP assay conditions in our  
221 system allowed detection of 100 fg/μl of *Cryptococcus* DNA (Figure 1A) and 100  
222 CFU/ml of *Cryptococcus* yeast suspension (Figure 1B).

223 The precision of the LAMP assay: In intra-batch and inter-batch precision tests, 20  
224 weakly positive samples (1pg/μl) were all positive, 20 negative samples were all negative,

225 and the agreement rates were 100%. The average positive time of the respective  
226 intra-batch and inter-batch assay was 26.82/27.33 min, SD value was 1.70/3.02, and CV  
227 value was 6.33%/11.06%.

228 Analysis of clinical samples: The total positive rate of 83 CSF samples detected by  
229 LAMP PCR was 91.6% (76/83). The positive rate of LAMP assay with LFA titer in the  
230 range of 1:80-1:2,040 was 100%, while those of lower titers (1:1-1:40) was 33.3-90.0%  
231 (Table 2).

232

### 233 **Microfluidic chip pathogen enrichment**

234 This core area was composed of 4 duplicate filtration membrane structures (Figure2).  
235 PDMS/curing reagent mixtures were injected through the filling inlet and the protruding  
236 small dots around the corner were used as a ventilation structure to enable the mixture  
237 injection more easily. The CSF sample was injected into the inlet and evenly distributed  
238 to four enrichment zones. After washing with deionized water, pathogens were  
239 effectively enriched and purified (Figure 3).

240

### 241 **Optimization of the on-chip nucleic acid extraction strategy**

242 Three different additives (NaOH, SDS and urea) were tested using standard Qiagen AL  
243 buffer, and it was found that urea and SDS inhibit the amplification if removed unclearly.  
244 Compared with other two additives, 0.5M NaOH improved the extraction efficiency  
245 (Figure 4A). We also compared the mild Bugbuster buffer (which was widely used to  
246 lyse bacteria and had little influence on amplification) with Qiagen AL buffer using  
247 NaOH additive and found that the lysis capacity of Bugbuster buffer was not enough for  
248 *Cryptococcus* (data not shown). Moreover, considering the tolerance of the chip  
249 temperature, we selected 25 °C, 45 °C, 65 °C and 85 °C as test points under the

250 aforementioned conditions, and incubated the lysing mixture for 5 minutes. The  
251 amplification results showed that the lysis efficiency could be improved under incubation  
252 at 65 °C or 85 °C (Figure 4B). To simplify the process, we chose 65 °C as the lysis  
253 temperature. Then, we explored the experimental effects of different concentrations of  
254 lyticase to optimize the best working concentration. The results showed that 40U/ml  
255 lyticase digested *Cryptococcus* at 30 °C for 30 minutes in the 1M sorbitol buffer  
256 environment, and the amplification effect was the best (Figure 4C).

257

### 258 **Performance of the chip**

259 The integrated chip was composed of functional layers (the reaction layer, collection  
260 layers, mixed layers and filtration layers) and other different layers. The illustration and  
261 the entire operation process were shown in Figure 2, Figure 5 and supplementary material  
262 video1. The sample was loaded into the filter well. After *Cryptococcus* enrichment, 300µl  
263 sterile deionized water was injected to wash the membrane to remove the matrix. The  
264 liquid was evacuated with air, and approximately 60µl of 1M sorbitol buffer containing  
265 40U/ml lyticase was injected through the inlet, and withdrawn from the outlet. After 5  
266 minutes of repeated suction operation, the filter membrane structure rich in pathogens  
267 was evenly immersed in the buffer environment, and incubated at 30 °C for 30 minutes.  
268 Subsequently, 60 µl of AL buffer containing 0.5M NaOH was injected. Repeated the  
269 above suction operation, and after the lysis buffer was in full contact with the  
270 *Cryptococcus*, incubated the chip at 65 °C for 5 minutes to release the nucleic acid.  
271 Then, 100 µl of 100 mM PH 8.0 Tris-HCl buffer was injected through the outlet, and the  
272 lysis buffer was neutralized by completely mixing from the top layer to the bottom layer  
273 to release free nucleic acids. The LAMP reaction solution and DNA were injected into  
274 the reaction well for isothermal amplification for 45 minutes. After 45 minutes of

275 amplification, the detection results could be successfully read by the naked eye (Figure  
276 6).

## 277 **Discussion**

278 Cryptococcal meningitis is a global threat with significant attributable mortality.  
279 Worldwide, CM is typically associated with HIV infection[2], and it is increasingly  
280 recognized in patients without HIV[6-11]. To date, information about integrated detection  
281 for CM diagnosis is still limited. In this study, we developed a LAMP-based microfluidic  
282 chip for the diagnosis of CM.

283 In order to ensure the accuracy and reliability of the LAMP system, we conducted  
284 LAMP assay performance verification. We collected 11 different serotypes, genotypes  
285 and AFLP types of *C. neoformans/gattii* standard strains for accuracy verification, which  
286 was 100% and showed its high accuracy. The agreement rates of intra-batch and  
287 inter-batch precision tests were 100%. The average positive time of the intra-batch and  
288 intra-batch assay was respectively 26.82/27.33 min, SD value was 1.70/3.02, and CV  
289 value was 6.33%/11.06%, which showed relatively stable reproducibility.

290 Generally, internal transcribed spacers have been used for molecular identification of  
291 fungal, but unfortunately, these sequences have little discrimination between *C.*  
292 *neoformans/gattii* and their closely related species, impairing their use in species  
293 differentiation by PCR methods[27]. To avoid non-specific amplification, we chose  
294 CAP10 gene to design LAMP primers, mainly considering that it encoded a specific  
295 capsular protein of *C. neoformans/gattii*, with little homology to their related species. The  
296 results showed the specificity was 100%, demonstrating the high specificity of the LAMP  
297 systems that we established.

298 The sensitivity of the LAMP assay for *Cryptococcus* cells is 100 CFU/ml. Significantly,  
299 it is of great importance for persons presenting early in the CM process with lower  
300 burden of infection, because India ink's sensitivity was only 42% when the *Cryptococcus*  
301 CFU value is <1,000 per ml of CSF[13]. Although the detection limit of LFA also  
302 reached 100 CFU/ml, LAMP assay could confirm cases which LFA had questionable  
303 results. Moreover, the sensitivity of the LAMP assay for *Cryptococcus* genomic DNA  
304 was 100 fg/ $\mu$ l, which was little lower than those of Min Chen *et al.* (20 fg genomic DNA  
305 tested by LAMP assay with turbidity method)[28] and Sara Gago *et al.* (2 fg genomic  
306 DNA tested by Real-time PCR)[18,19]. The potential reason may be that we added the  
307 cryptococcal DNA to the sterile CSF for further DNA extraction, which consumed a  
308 portion of the DNA, while they used DNA to detect directly. Accordingly, we determined  
309 the extraction efficiency of approximately 53.5%. Therefore, the detection limit of  
310 cryptococcal DNA in our study was similar to that of the Min Chen *et al.* study[28].

311 In clinical specimen verification, the total positive rate of 83 CSF samples detected by  
312 LAMP PCR was 91.6% (76/83), which was higher than previously reported LAMP assay  
313 with turbidity method (87.1%, 74/85)[28] or real-time PCR (90.7%, 39/43) results[19].  
314 Although the positive rate of LFA titer in the range of 1:80-1:2,040 was 100%, those of  
315 lower titer (1:1-1:40) was 33.3-90.0%. The potential reason might be that dead  
316 *Cryptococcus* cells continue to release capsular polysaccharide antigen, and the body  
317 clears the antigen relatively slowly. Even after several months of effective treatment, the  
318 results of LFA could still be positive. Therefore, the results of a patient with low LFA  
319 titer could not truly reflect the burden of *Cryptococcus* in vivo.

320 In all, we established a rapid, accurate, sensitive, specific, and reproducible LAMP  
321 assay to detect *C. neoformans/gattii* in CSF samples. This assay might be an alternative  
322 method for rapid diagnosis of cryptococcal meningitis, especially for those with low

323 cryptococcal load. Moreover, our research confirmed the feasibility of this LAMP system,  
324 which made a good foundation for the further development of microfluidic chip.

325 Developing a microfluidic chip for real-life application of CM diagnosis remains a  
326 challenge. Major limiting factors are low-concentration pathogen, complex sample  
327 matrices and difficulties in extraction of *Cryptococcus* DNA on the chip. For removing  
328 interfering substances and enrichment of pathogens, commonly used pretreatment tools  
329 are centrifugation, filtration membranes or immune-based techniques [29]. However,  
330 coupling the centrifugal device to the microfluidic chip is relatively complicated, and the  
331 activity of immune-based methods is unstable. In contrast, the filter membrane has a  
332 simple structure and can quickly and efficiently enrich pathogens at a level of  $\sim 10^{-1} \mu\text{m}$   
333 (*Cryptococcus* was nearly  $5 \mu\text{m}$  in diameter)[30]. Benefit from these features, the filter  
334 membrane structure was conveniently integrated into our chip, thus simplifying the entire  
335 capture process. The core area of the microfluidic chip was composed of 4 duplicate  
336 filtration membrane structures, aiming to expand the filtration area, improve fluid  
337 throughput and prevent enrichment oversaturation caused by a single membrane structure.  
338 Supporting pillars were used to support the filter membrane to improve filtration  
339 efficiency. Pathogens in CSF samples were enriched through filtration membrane,  
340 washed and purified, thus improving the system sensitivity and avoiding the  
341 inconsistency of results due to the heterogeneity of sample matrix. In addition, the  
342 successful extraction of on-chip cryptococcal nucleic acid is another key issue of this  
343 microfluidic chip. Traditional methods often adopted beads mechanical capture method  
344 or enzymatic cell wall lysis method. However, limited by the characteristics of the chip,  
345 the mechanical method could not be applied. Accordingly, various experiments were  
346 carried out to optimize on-chip *Cryptococcus* nucleic acid extraction. It was confirmed  
347 that the use of standard Qiagen AL buffer and 0.5M NaOH and incubated the lysing

348 mixture at 65 °C for 5 minutes can improve the efficiency of nucleic acid extraction in  
349 the chip. However, the above conditions were still insufficient. Because *Cryptococcus* is  
350 different from other fungi, in addition to the common cell wall, its outer layer is  
351 surrounded by a thick low electron density mucus capsule. Under the double protection of  
352 the capsule and cell wall, *Cryptococcus* is much tougher and genomic DNA extraction is  
353 more difficult. The removal of external structures to form protoplasts is essential for  
354 nucleic acid extraction. Lyticase is a fungal cell wall lysis enzyme. We explored the  
355 experimental effects of different concentrations of lyticase to optimize the best working  
356 concentration. Moreover, protoplasts were very sensitive to external conditions and prone  
357 to membrane rupture with changes in osmotic pressure. We used sorbitol buffer as the  
358 osmotic pressure stabilizer to ensure a high protoplast formation rate. The results showed  
359 that 40U/ml lyticase digested *Cryptococcus* at 30 °C for 30 minutes in the 1M sorbitol  
360 buffer environment, and the amplification effect was the best. The nucleic acid extract  
361 was amplified isothermally for 45 minutes and the detection results could be successfully  
362 read by the naked eye.

363 This microfluidic chip, integrating sample *Cryptococcus* enrichment, optimized nucleic  
364 acid extraction and LAMP detection unit, streamlined reaction processes and reduced the  
365 exposure risk of directly handling cryptococcal samples. It did not require any additional  
366 instruments and provided a rapid, reliable, as well as high-efficiency approach. We  
367 believed that this integrated chip truly realized the "sample-to-answer" application and  
368 could be easily used for clinical cryptococcal prediagnosis.

369

### 370 **Acknowledgements**

371 We thank Professor Min Chen (Department of Dermatology, Shanghai Key Laboratory of  
372 Molecular Medical Mycology, Shanghai Institute of Medical Mycology, Changzheng

373 Hospital, Second Military Medical University, Shanghai, China) for giving us the  
374 standard strain.

375

### 376 **Disclosure statement**

377 No potential conflict of interest was reported by the author(s).

378

### 379 **Funding**

380 This study was funded in part with the grants from the National Natural Science  
381 Foundation of China (NSFC 81672105), the Program of Science and Technology  
382 Commission of Shanghai Municipality (No.17JC1401000), the Shanghai Public Health  
383 System Construction Three-Year Action Plan (2020-2022) Key Disciplines  
384 (GWV-10.1-XK04), the Major Special Project of “Prevention and Control of Major  
385 Infectious Diseases such as AIDS and Viral Hepatitis” (2018ZX10732401-003-016), the  
386 Program of Science and Technology Commission of Shanghai Municipality  
387 (19441903700), the National Natural Science Foundation of China (NSFC 21577019)  
388 and the Shanghai Youth Clinical Medical Talent Training Program (Shanghai Medical  
389 WeiJi 2016-04).

390

### 391 **References**

392 [1] May R, Stone N, Wiesner D, et al. Cryptococcus: from environmental saprophyte to  
393 global pathogen. *Nature reviews Microbiology*. 2016;14(2):106-17.

394 [2] Rajasingham R, Smith R, Park B, et al. Global burden of disease of HIV-associated  
395 cryptococcal meningitis: an updated analysis. *The Lancet Infectious diseases*.  
396 2017;17(8):873-881.



- 397 [3] Tsai W, Lien C, Lee J, et al. The prognostic factors of HIV-negative adult  
398 cryptococcal meningitis with a focus on cranial MRI-based neuroimaging findings.  
399 Journal of clinical neuroscience : official journal of the Neurosurgical Society of  
400 Australasia. 2018;55:57-61.
- 401 [4] Pyrgos V, Seitz A, Steiner C, et al. Epidemiology of cryptococcal meningitis in the  
402 US: 1997-2009. PloS one. 2013;8(2):e56269.
- 403 [5] Gago S, Serrano C, Alastruey-Izquierdo A, et al. Molecular identification,  
404 antifungal resistance and virulence of *Cryptococcus neoformans* and *Cryptococcus*  
405 *deneoformans* isolated in Seville, Spain. Mycoses. 2017;60(1):40-50.
- 406 [6] Li-Ping Zhu J-QW, Bin Xu, Xue-Ting Ou, Qiang-Qiang Zhang, Xin-Hua Weng.  
407 Cryptococcal meningitis in non-HIV-infected patients in a Chinese tertiary care  
408 hospital, 1997-2007. Med Mycol. 2010;48(4):570-579.
- 409 [7] Fang W, Fa Z, Liao W. Epidemiology of *Cryptococcus* and cryptococcosis in China.  
410 Fungal genetics and biology : FG & B. 2015;78:7-15.
- 411 [8] Liu Y, Kang M, Wu S, et al. Different characteristics of cryptococcal meningitis  
412 between HIV-infected and HIV-uninfected patients in the Southwest of China.  
413 Medical mycology. 2017;55(3):255-261.
- 414 [9] Choi Y, Ngamskulrungrroj P, Varma A, et al. Prevalence of the VN1c genotype of  
415 *Cryptococcus neoformans* in non-HIV-associated cryptococcosis in the Republic of  
416 Korea. FEMS yeast research. 2010;10(6):769-78.
- 417 [10] Mihara T, Izumikawa K, Kakeya H, et al. Multilocus sequence typing of  
418 *Cryptococcus neoformans* in non-HIV associated cryptococcosis in Nagasaki, Japan.

- 419 Medical mycology. 2013;51(3):252-60.
- 420 [11] Lahiri S, Manjunath N, Bhat M, et al. Clinical insights and epidemiology of central  
421 nervous system infection due to *Cryptococcus neoformans/gattii* species complexes:  
422 A prospective study from South India. *Medical mycology*. 2020;58(5):600-608.
- 423 [12] Control CfD. *Cryptococcus gattii* infection statistics.  
424 <https://www.cdc.gov/fungal/diseases/cryptococcosis-gattii/statistics.html>. 2020:CDC,  
425 Atlanta, GA.
- 426 [13] Rajasingham R, Wake R, Beyene T, et al. Cryptococcal Meningitis Diagnostics and  
427 Screening in the Era of Point-of-Care Laboratory Testing. *Journal of clinical*  
428 *microbiology*. 2019;57(1).
- 429 [14] Boulware D, Rolfes M, Rajasingham R, et al. Multisite validation of cryptococcal  
430 antigen lateral flow assay and quantification by laser thermal contrast. *Emerging*  
431 *infectious diseases*. 2014;20(1):45-53.
- 432 [15] M C, JR P. Cryptococcosis. *Infectious disease clinics of North America*.  
433 2006;20(3):507-44, v-vi.
- 434 [16] Lindsley MD, Mekha N, Baggett HC, et al. Evaluation of a newly developed lateral  
435 flow immunoassay for the diagnosis of cryptococcosis. *Clin Infect Dis*. 2011  
436 Aug;53(4):321-5.
- 437 [17] Rivera V, Gaviria M, Muñoz-Cadavid C, et al. Validation and clinical application of  
438 a molecular method for the identification of *Cryptococcus*  
439 *neoformans/Cryptococcus gattii* complex DNA in human clinical specimens. *The*  
440 *Brazilian journal of infectious diseases : an official publication of the Brazilian*

- 441 Society of Infectious Diseases. 2015;19(6):563-70.
- 442 [18] Tavares E, Azevedo C, Panagio L, et al. Accurate and sensitive real-time PCR  
443 assays using intergenic spacer 1 region to differentiate *Cryptococcus gattii* sensu  
444 lato and *Cryptococcus neoformans* sensu lato. *Medical mycology*.  
445 2016;54(1):89-96.
- 446 [19] Gago S, Esteban C, Valero C, et al. A multiplex real-time PCR assay for  
447 identification of *Pneumocystis jirovecii*, *Histoplasma capsulatum*, and  
448 *Cryptococcus neoformans*/*Cryptococcus gattii* in samples from AIDS patients with  
449 opportunistic pneumonia. *Journal of clinical microbiology*. 2014;52(4):1168-76.
- 450 [20] X F, X F, B L, et al. Development of a singleplex PCR assay for rapid identification  
451 and differentiation of *Cryptococcus neoformans* var. *grubii*, *Cryptococcus*  
452 *neoformans* var. *neoformans*, *Cryptococcus gattii*, and hybrids. *Journal of clinical*  
453 *microbiology*. 2013;51(6):1920-3.
- 454 [21] Dou M, Sanjay S, Dominguez D, et al. Multiplexed instrument-free meningitis  
455 diagnosis on a polymer/paper hybrid microfluidic biochip. *Biosensors &*  
456 *bioelectronics*. 2017;87:865-873.
- 457 [22] Dou M, Dominguez D, Li X, et al. A versatile PDMS/paper hybrid microfluidic  
458 platform for sensitive infectious disease diagnosis. *Analytical chemistry*.  
459 2014;86(15):7978-86.
- 460 [23] Czilwik G, Messinger T, Strohmeier O, et al. Rapid and fully automated bacterial  
461 pathogen detection on a centrifugal-microfluidic LabDisk using highly sensitive  
462 nested PCR with integrated sample preparation. *Lab Chip*. 2015;15(18):3749-59.

- 463 [24] Bridle H, Kersaudy-Kerhoas M, Miller B, et al. Detection of *Cryptosporidium* in  
464 miniaturised fluidic devices. *Water Res.* 2012 Apr 15;46(6):1641-61.
- 465 [25] Zhu Z, Zhang W, Leng X, et al. Highly sensitive and quantitative detection of rare  
466 pathogens through agarose droplet microfluidic emulsion PCR at the single-cell  
467 level. *Lab Chip.* 2012 Oct 21;12(20):3907-13.
- 468 [26] Swierczewska M, Liu G, Lee S, et al. High-sensitivity nanosensors for biomarker  
469 detection. *Chem Soc Rev.* 2012 Apr 7;41(7):2641-55.
- 470 [27] Espy M, Uhl J, Sloan L, et al. Real-time PCR in clinical microbiology: applications  
471 for routine laboratory testing. *Clinical microbiology reviews.* 2006;19(1):165-256.
- 472 [28] Chen M, Zhou J, Li J, et al. Evaluation of five conventional and molecular  
473 approaches for diagnosis of cryptococcal meningitis in non-HIV-infected patients.  
474 *Mycoses.* 2016;59(8):494-502.
- 475 [29] Strohmeier O, Keller M, Schwemmer F, et al. Centrifugal microfluidic platforms:  
476 advanced unit operations and applications. *Chemical Society reviews.*  
477 2015;44(17):6187-229.
- 478 [30] Qi LX, Zhang; Yuhan, Yao; Wenwen, Jing; Sixiu, Liu; Guodong, Sui. . A novel  
479 microfluidic module for rapid detection of airborne and waterborne pathogens.  
480 *Sensors & Actuators B Chemical* 2017:S092540051732244X.

481

482

483

**Table 1 Sequence of the LAMP primers**

| Primer | Sequence Reference                            |
|--------|-----------------------------------------------|
| FIP    | GTGGATTCCAGGCTGCTGATACATTTTCCGGCCCTTCCAAGTCTA |
| BIP    | GATGGGGATGCTGAGTTGAGGAATTTTCCGCCCAACAGTGAACA  |
| F3     | AACGTCCACGCCTTCTTCT                           |
| B3     | GGTACTCACTCTCCATGTCG                          |

484

485

**Table 2 LAMP results for clinical samples from patients with proven CM**

| Titres of CrAg | N  | +  | - | Positive rate (%) |
|----------------|----|----|---|-------------------|
| 1:20480        | 3  | 3  | 0 | 100%              |
| 1:10240        | 8  | 8  | 0 | 100%              |
| 1:5120         | 3  | 3  | 0 | 100%              |
| 1:2560         | 4  | 4  | 0 | 100%              |
| 1:1280         | 8  | 8  | 0 | 100%              |
| 1:640          | 8  | 8  | 0 | 100%              |
| 1:320          | 8  | 8  | 0 | 100%              |
| 1:160          | 10 | 10 | 0 | 100%              |
| 1:80           | 7  | 7  | 0 | 100%              |
| 1:40           | 10 | 9  | 1 | 90.0%             |
| 1:20           | 7  | 5  | 2 | 71.4%             |
| 1:10           | 3  | 1  | 2 | 33.3%             |
| 1:5            | 2  | 1  | 1 | 50.0%             |
| 1:1            | 2  | 1  | 1 | 50.0%             |
| Total          | 83 | 76 | 7 | 91.6%             |

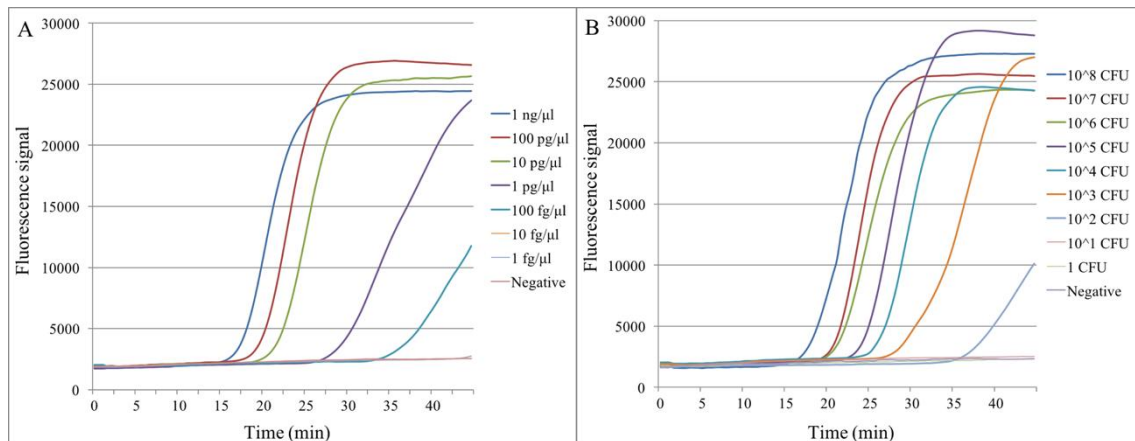

486

487

488 Figure 1. The detection limits of the LAMP assay.

489 A: Detection limit of *Cryptococcus* DNA. The blue, brown, green, purple, light blue,  
490 yellow, light purple and pink lines represented 1ng/μl, 100pg/μl, 10pg/μl, 1pg/μl,  
491 100fg/μl, 10fg/μl, 1fg/μl and negative templates, respectively. B: Detection limit of  
492 *Cryptococcus* yeast suspension. The blue, brown, purple, light blue, yellow, light purple,  
493 pink, light green and grey lines represented 10<sup>8</sup>, 10<sup>7</sup>, 10<sup>6</sup>, 10<sup>5</sup>, 10<sup>4</sup>, 10<sup>3</sup>, 10<sup>2</sup>,10, 1 CFU and  
494 negative templates, respectively.

495

496

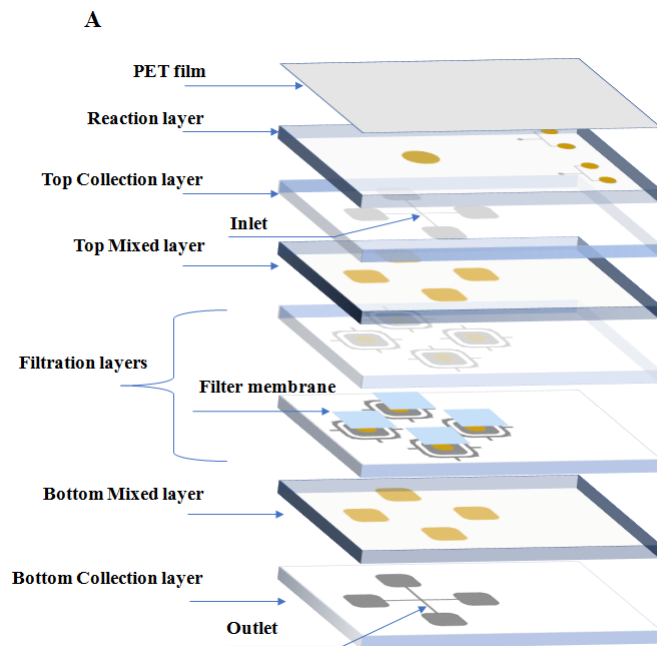

497

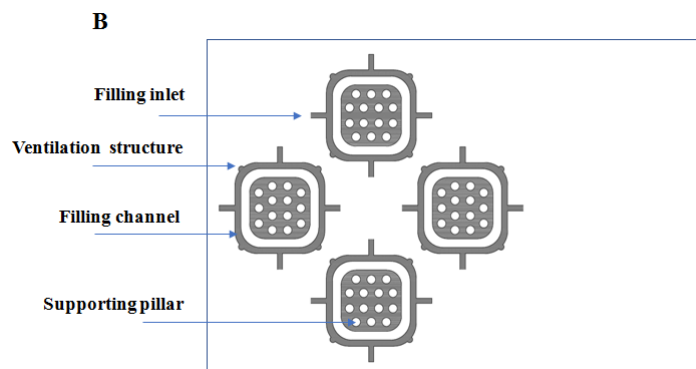

498

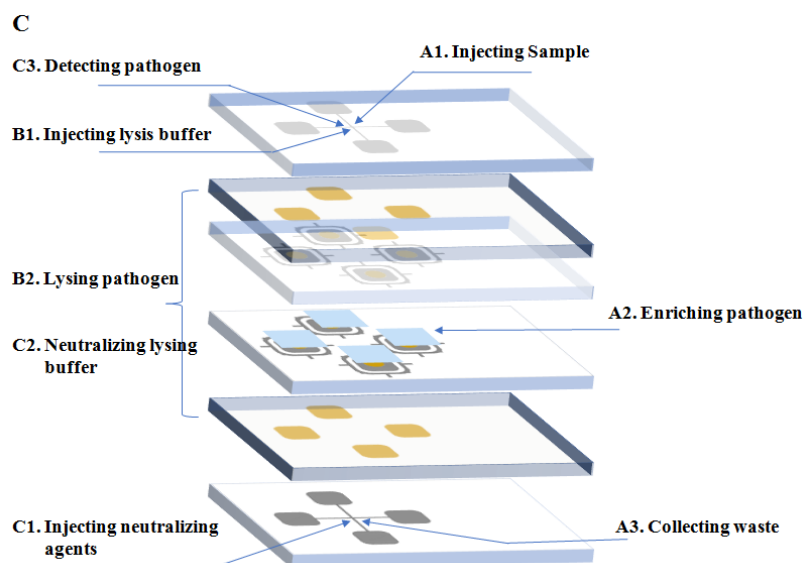

499

500 Figure 2. Illustration of this microfluidic chip. A) The integrated chip has nine layers,  
501 including functional layers and other different layers. The yellow part on these layers  
502 indicates that the area has been punched through, and the gray part indicates that the area  
503 is a fluid channel or a sinking part. B) This core area consisted of 4 duplicate parts.  
504 PDMS/curing reagent mixtures were injected through the filling inlet and the protruding  
505 small dots around the corner were used as a ventilation structure. Supporting pillars were  
506 used to support the filter membrane to improve filtration efficiency. C) The nucleic acid  
507 extraction process of the microfluidic chip included three steps. A. Pathogen enrichment  
508 using filter membrane; B. Pathogen lysing with optimized lysis buffer; C. Pathogen  
509 nucleic acid protection with neutralized agents.

510  
511  
512

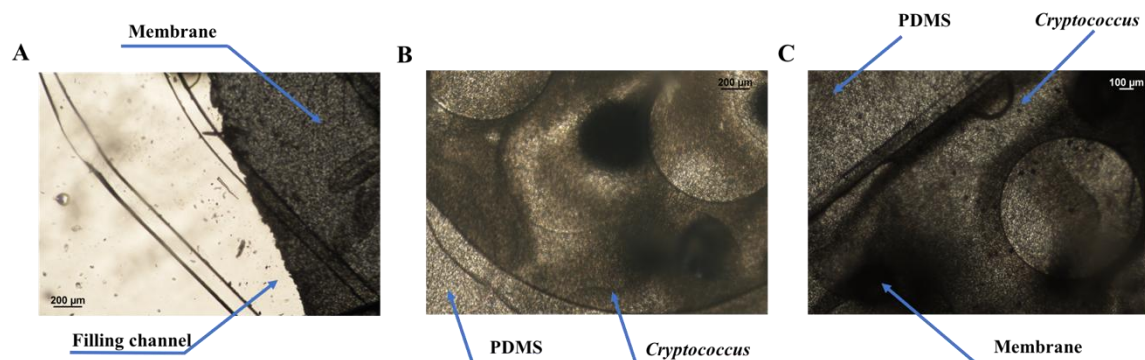

513  
514

515 Figure 3. Filtration membrane enrichment images. A) Image of filtration membrane  
516 structure before *Cryptococcus* injection; B) Image of filtration membrane structure after  
517 *Cryptococcus* injection; C) *Cryptococcus* enriched by filtration membrane was stained by  
518 black ink.

519



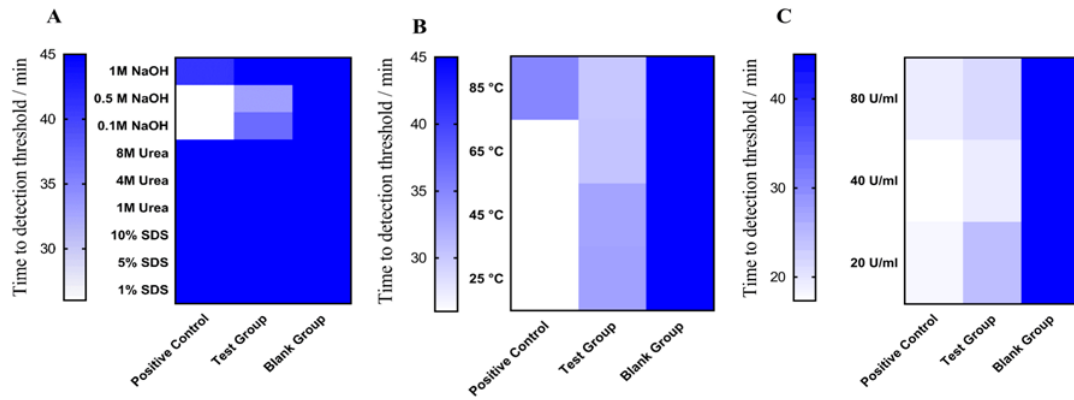

520

521 Figure 4. Nucleic acid fast extraction strategy. The positive control, test group and blank  
522 group, (referring to the nucleic acid extracted by the standard method, the sample and the  
523 DNase-free water respectively) were put into the lysis buffer, and then detected by the  
524 LAMP reaction after nucleic acid extraction. A) Three additives were tested for lysing  
525 capability and influence on LAMP reaction; B) Four temperature points were tested for  
526 lysing capability and influence on LAMP reaction. C) 1M Sorbitol buffer containing  
527 different concentration of lyticase was tested for its lysing capability and influence on  
528 LAMP reaction.

529

530

531

532

533

534

535

536

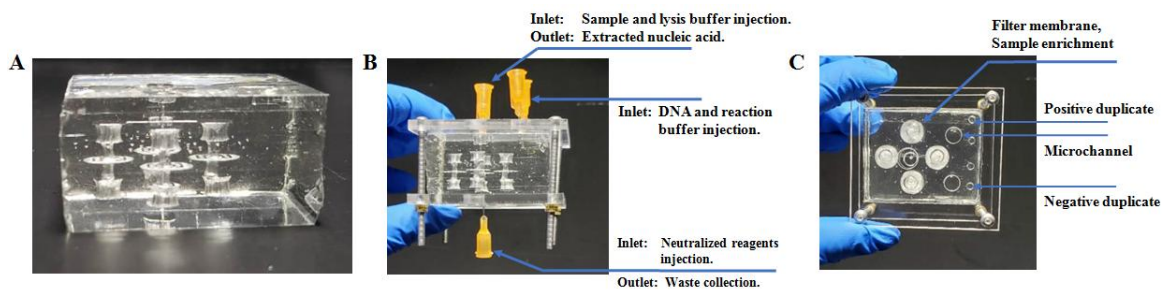

537

538 Figure 5. Picture of integrated chip. A) Integrated chip with PET film sealed; B)  
539 Integrated chip inlet and outlet; C) Integrated chip top view, including filter membrane,  
540 detection well, inlet, outlet and microchannels.

541

542

543

544

545

546

547

548

549

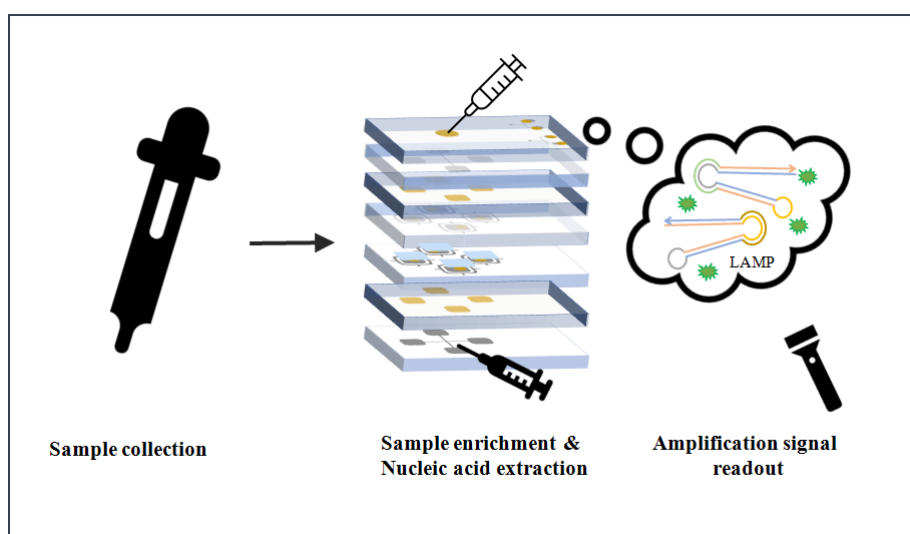

550

551 Figure 6. The whole process of detecting *Cryptococcus* on microfluidic chip.

552

553

554 **Table S1 LAMP results of CSF positive samples with other CNS infections**

|    | <b>Samples</b> | <b>Culture results</b>             | <b>N</b> | <b>LAMP results</b> |
|----|----------------|------------------------------------|----------|---------------------|
| 1  | CSF            | <i>Acinetobacter baumannii</i>     | 2        | -                   |
| 2  | CSF            | <i>Acinetobacter junii</i>         | 1        | -                   |
| 3  | CSF            | <i>Klebsiella pneumoniae</i>       | 3        | -                   |
| 4  | CSF            | <i>Staphylococcus aureus</i>       | 1        | -                   |
| 5  | CSF            | <i>Staphylococcus hominis</i>      | 3        | -                   |
| 6  | CSF            | <i>Staphylococcus capitis</i>      | 3        | -                   |
| 7  | CSF            | <i>Staphylococcus epidermidis</i>  | 2        | -                   |
| 8  | CSF            | <i>Staphylococcus haemolyticus</i> | 1        | -                   |
| 9  | CSF            | <i>Enterococcus faecalis</i>       | 3        | -                   |
| 10 | CSF            | <i>Listeria monocytogenes</i>      | 2        | -                   |
| 11 | CSF            | <i>Corynebacterium striatum</i>    | 1        | -                   |
| 12 | CSF            | <i>Bacillus cereus</i>             | 1        | -                   |
| 13 | CSF            | <i>Candida albicans</i>            | 3        | -                   |
| 14 | CSF            | <i>Candida parapsilosis</i>        | 1        | -                   |
| 15 | CSF            | <i>Candida orthopsilosis</i>       | 1        | -                   |
| 16 | CSF            | <i>Candida glabrata</i>            | 2        | -                   |
| 17 | CSF            | <i>Rhodotorula</i>                 | 1        | -                   |
| 18 | CSF            | <i>Nocardia pilaris</i>            | 1        | -                   |
| 19 | CSF            | <i>Nocardia asiatica</i>           | 1        | -                   |
| 20 | CSF            | <i>Mycobacterium tuberculosis</i>  | 4        | -                   |
| 21 | CSF            | <i>Aspergillus flavus</i>          | 1        | -                   |

|              |                 |                               |    |   |
|--------------|-----------------|-------------------------------|----|---|
| 22           | CSF             | <i>Candida parapsilosis</i> . | 1  | - |
|              |                 | <i>Aspergillus niger</i>      |    |   |
| 23           | CSF             | <i>Cysticercus</i>            | 1  | - |
| 24           | Sterile CSF     | Sterile CSF                   | 1  | - |
| 25           | Ultrapure water | Ultrapure water               | 1  | - |
| <b>Total</b> |                 |                               | 42 |   |

555

556

557

558

**Table S2 Standard *C. neoformans/gattii* strains**

|    | <b>Standard strains</b>             | <b>Serotype</b> | <b>Genotype</b> | <b>AFLP Type</b> | <b>LAMP</b> |
|----|-------------------------------------|-----------------|-----------------|------------------|-------------|
| 1  | <i>C. neoformans var grubii</i>     | A               | VNI             | 1                | +           |
| 2  | <i>C. neoformans var grubii</i>     | A               | VNII            | 1A               | +           |
| 3  | <i>C. neoformans var neoformans</i> | AD              | VNIII           | 1B               | +           |
| 4  | <i>C. neoformans var neoformans</i> | D               | VNIV            | 2                | +           |
| 5  | <i>C. neoformans var gattii</i>     | B               | VGI             | 4                | +           |
| 6  | <i>C. neoformans var gattii</i>     | B               | VGII            | 6                | +           |
| 7  | <i>C. neoformans var gattii</i>     | B               | VGIII           | 5                | +           |
| 8  | <i>C. neoformans var gattii</i>     | C               | VGIV            | 7                | +           |
| 9  | <i>C. neoformans var grubii</i>     | A               | VNI             | 1                | +           |
| 10 | <i>C. neoformans var neoformans</i> | D               | VNIV            | 2                | +           |
| 11 | <i>C. neoformans var grubii</i>     | A               | VNI             | 1                | +           |

559

560

561

562 **Table S3 LAMP results of pure cultured isolates from different microorganisms**

|    | <b>Isolates</b>                    | <b>N</b> | <b>LAMP results</b> |
|----|------------------------------------|----------|---------------------|
| 1  | <i>Acinetobacter baumannii</i>     | 3        | -                   |
| 2  | <i>Klebsiella pneumoniae</i>       | 5        | -                   |
| 3  | <i>Escherichia coli</i>            | 1        | -                   |
| 4  | <i>Staphylococcus epidermidis</i>  | 2        | -                   |
| 5  | <i>Staphylococcus hominis</i>      | 1        | -                   |
| 6  | <i>Staphylococcus haemolyticus</i> | 1        | -                   |
| 7  | <i>Candida albicans</i>            | 2        | -                   |
| 8  | <i>Candida tropical</i>            | 2        | -                   |
| 9  | <i>Candida glabrata</i>            | 2        | -                   |
| 10 | <i>Candida krusei</i>              | 2        | -                   |
| 11 | <i>Candida guilliermondii</i> ;    | 2        | -                   |
| 12 | <i>Candida parapsilosis</i>        | 2        | -                   |
| 13 | <i>Candida orthopsilosis</i>       | 2        | -                   |
| 14 | <i>Candida cornea</i>              | 1        | -                   |
| 15 | <i>Candida simmolone</i>           | 1        | -                   |
| 16 | <i>Rhodotorula</i>                 | 2        | -                   |
| 17 | <i>Pichia norvegicus</i>           | 2        | -                   |
| 18 | <i>Issatchenkia orientalis</i>     | 1        | -                   |
| 19 | <i>Trichosporon asahii</i>         | 1        | -                   |
| 20 | <i>Asian nocardia</i>              | 2        | -                   |
| 21 | <i>Fovea nocardia</i>              | 1        | -                   |
| 22 | <i>Brazilian nocardia</i>          | 1        | -                   |

|       |                                  |    |   |
|-------|----------------------------------|----|---|
| 23    | <i>Mycobacterium abscess</i>     | 1  | - |
| 24    | <i>European actinomycetes</i>    | 1  | - |
| 25    | <i>Penicillium chrysogenum</i>   | 1  | - |
| 26    | <i>Aspergillus fumigatus</i>     | 1  | - |
| 27    | <i>Aspergillus terreus</i>       | 1  | - |
| 28    | <i>Aspergillus niger</i>         | 1  | - |
| 29    | <i>Aspergillus oryzae</i>        | 1  | - |
| 30    | <i>Cyanobacterium marneffeii</i> | 1  | - |
| 31    | <i>Stephanoascus ciferrii</i>    | 1  | - |
| 32    | <i>Exophiala dermatitidis</i>    | 2  | - |
| Total |                                  | 50 |   |

563
